# Supplementary material for: Non-SMC condensin I complex proteins control chromosome segregation and survival of proliferating cells in the zebrafish neural retina
Source: PubMed Central journal article supplement (PMC2727499; doi:10.1186/1471-213x-9-40), 2009-07-08

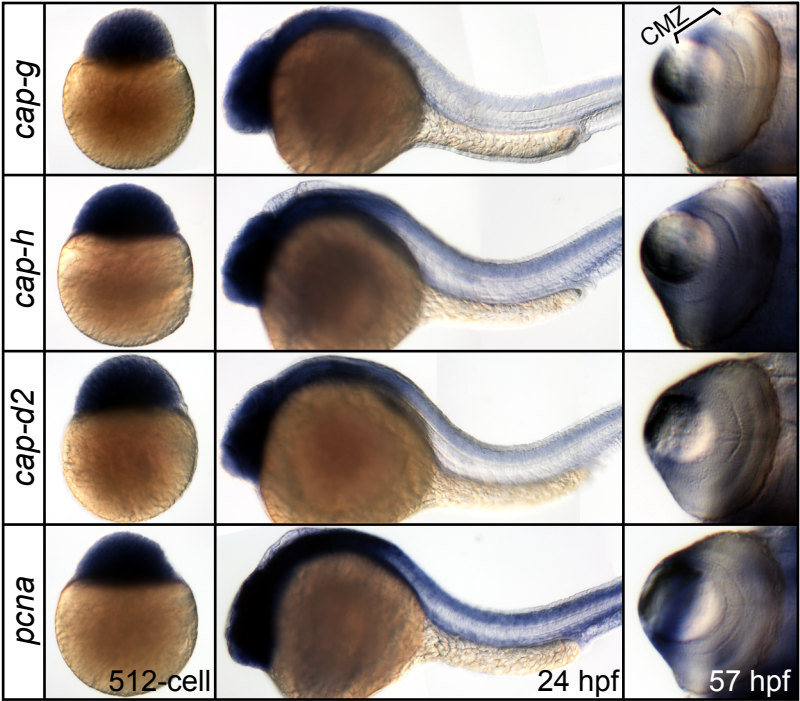

Supplement: 1471-213X-9-40-S2.pdf [file 1471-213X-9-40-S2.pdf]
